1 Lateral and longitudinal fish eDNA distribution in  
2 dynamic riverine habitats

3 Running title: spatio-temporal eDNA distribution

4

5 **Bettina Thalinger<sup>1,2\*</sup>, Dominik Kirschner<sup>1,3</sup>, Yannick Pütz<sup>1</sup>, Christian Moritz<sup>4</sup>, Richard**  
6 **Schwarzenberger<sup>4</sup>, Josef Wanzenböck<sup>5</sup> & Michael Traugott<sup>1,3</sup>**

7

8 <sup>1</sup> Department of Zoology, Universität Innsbruck, Technikerstr. 25, 6020 Innsbruck, Austria

9 <sup>2</sup> Centre for Biodiversity Genomics, University of Guelph, 50 Stone Road E, N1G2W1,  
10 Guelph, Ontario, Canada

11 <sup>3</sup> Sinsoma GmbH, Lannes 6, 6176 Voels, Austria

12 <sup>4</sup> ARGE Limnologie GesmbH, Hunoldstr. 14, 6020 Innsbruck, Austria

13 <sup>5</sup> Research Department for Limnology, Mondsee, Universität Innsbruck, Mondseestr. 9, 5310  
14 Mondsee, Austria

15

16 **\*Corresponding author:**

17 Bettina Thalinger, [bettina.thalinger@gmail.com](mailto:bettina.thalinger@gmail.com)

18 Centre for Biodiversity Genomics, University of Guelph, 50 Stone Road E, N1G 2W1,  
19 Guelph, Ontario, Canada; phone: +1 519-824-4120 Ext. 53800

20 **Abstract**

21 Assessing the status and distribution of fish populations in rivers is essential for management  
22 and conservation efforts in these dynamic habitats and currently, environmental DNA (eDNA)  
23 is established as an alternative and/or complementary approach to the traditional monitoring  
24 of fish species. In lotic systems, a sound understanding of hydrological conditions and their  
25 influence on the local target DNA detection probability and quantity is key for the  
26 interpretation of eDNA-based results. However, the effect of seasonal and diurnal changes in  
27 discharge and the comparability of semi-quantitative results between species remain hardly  
28 addressed. We conducted a cage experiment with four fish species in a glacier-fed, fish-free  
29 river in Tyrol (Austria) during summer, fall, and winter discharge (i.e. 25-fold increase from  
30 winter to summer). Per season, water samples were obtained on three consecutive days at  
31 13 locations downstream of the cages including lateral sampling at 1-2 m distance across the  
32 wetted width. Fish eDNA was quantified by species-specific endpoint PCR followed by  
33 capillary electrophoresis. Close to the cages, lateral eDNA distribution was heterogenous,  
34 mirrored cage placement within the stream, and showed the diluting effect of increased  
35 discharge. Additionally, the eDNA signals were significantly lower for fish species of larger  
36 individual size at comparable per-species biomass. For further downstream distances with  
37 laterally homogenous eDNA distribution, the signals decreased significantly with increasing  
38 distance independent of longitudinal discharge changes. This study exemplifies the  
39 importance of prevailing hydrological conditions for the interpretation of eDNA-based data  
40 across seasons. To control for heterogenous eDNA distribution and enable comparisons  
41 over time, sampling schemes in lotic habitats need to incorporate hydrological conditions and  
42 species biology.

43

44 **Keywords:** lotic, environmental DNA, hydrology, sampling scheme, *Salmo trutta*,  
45 *Oncorhynchus mykiss*, *Salvelinus fontinalis*, *Phoxinus phoxinus*,

## 46 **Introduction**

47 In times of rapid environmental changes there is a growing need for biomonitoring in both  
48 terrestrial and aquatic systems (Cardinale et al., 2012; Tickner et al., 2020). Reliable and  
49 cost-effective approaches for species detection are thus key for tracking species in time and  
50 space and informing conservation and management efforts (Jetz et al., 2019). Molecular  
51 methods detecting environmental DNA (eDNA) released by organisms into their environment  
52 have the capability to accommodate this demand as they are non-invasive, sensitive, and  
53 enable the processing of large sample numbers (Barnes & Turner, 2016; Deiner et al., 2017;  
54 Thomsen & Willerslev, 2015). In aquatic habitats eDNA can be used for monitoring of taxa in  
55 both lotic and lentic systems with a focus on endangered or invasive species and flexible  
56 year-round application (Beng & Corlett, 2020; e.g. Harper et al., 2019; Thomsen & Willerslev,  
57 2015).

58 Rivers and streams contain, absorb, and transport eDNA of aquatic and terrestrial  
59 species and are thus ideal for cross-habitat species detection (Deiner, Fronhofer, Mächler,  
60 Walser, & Altermatt, 2016; Sales et al., 2020), albeit the dynamic nature of these ecosystems  
61 leads to constantly changing conditions during sampling (Shogren et al., 2017; Willett,  
62 McCoy, Taylor Perron, Goren, & Chen, 2014). Nevertheless, aspects such as a species'  
63 upstream distribution limits (Carim et al., 2019; Robinson, de Leaniz, & Consuegra, 2019) or  
64 local abundance and its change over time (Doi et al., 2017; Levi et al., 2019; Thalinger, Wolf,  
65 Traugott, & Wanzenböck, 2019) have been successfully examined in lotic systems via eDNA.  
66 Often, these efforts are combined with traditional monitoring techniques to confirm molecular  
67 results and facilitate their interpretation (Evans, Shirey, Wieringa, Mahon, & Lamberti, 2017;  
68 Wilcox et al., 2016) and there is generally a good consensus between molecular and non-  
69 molecular data.

70 However, changes in hydrological conditions have profound influence on the  
71 distribution and persistence of eDNA in the water column (reviewed by Harrison, Sunday, &  
72 Rogers, 2019), which makes the interpretation of local eDNA signals or comparisons  
73 between sampling campaigns challenging. The longitudinal eDNA detection probability in

74 rivers directly depends on dilution, transport, deposition, resuspension, and degradation  
75 (reviewed by Harrison et al., 2019). These effects were examined for small streams (Fremier,  
76 Strickler, Parzych, Powers, & Goldberg, 2019; Shogren et al., 2017; Wilcox et al., 2016) and  
77 large river systems (Deiner & Altermatt, 2014; Pont et al., 2018), and eDNA was mostly  
78 found to behave similar to fine particulate organic matter. Recently, studies also focused on  
79 lateral eDNA distribution, describing a “plume” downstream of the source and gradual lateral  
80 homogenization with increasing downstream distance (Laporte et al., 2020; Wood, Erdman,  
81 York, Trial, & Kinnison, 2020). The discharge-dependent changes of these patterns or  
82 species-specific effects were, however, neglected.

83 Alpine rivers exemplify the benefits of eDNA-based monitoring as well as and the  
84 challenges associated with sampling campaigns in such dynamic ecosystems. The prevailing  
85 low water temperatures permit only humble population densities and a limited species  
86 inventory at risk of biodiversity loss due to increased climate change effects (Settele et al.,  
87 2015). Anthropogenic influences in the form of straightened riverbeds, hydropower plants,  
88 and dams add to this strained situation and intensify the need for monitoring the remaining  
89 natural fish populations (Faulks, Gilligan, & Beheregaray, 2011; Fette, Weber, Peter, &  
90 Wehrli, 2007). The discharge in these rivers varies with changing seasons from winter  
91 drought to high water levels in spring and summer (snow melt and glacial melt) to  
92 intermediate conditions in fall. Additionally, the melting processes induce substantial diurnal  
93 discharge changes in spring and summer (Bard et al., 2015). Therefore, traditional  
94 monitoring via electrofishing is only possible outside of protected periods, spawning seasons,  
95 and at low discharge and turbidity in fall and early winter. eDNA-based approaches can  
96 potentially overcome these limitations, but only after accounting for the spatio-temporal  
97 dynamics of Alpine rivers and by optimizing sampling schemes and the interpretation of the  
98 derived results.

99 In this study, we compared changes in lateral and longitudinal eDNA distribution  
100 between seasons in a glacier-fed Alpine river. The experiments were conducted with caged  
101 fish and we used species-specific endpoint PCR combined with capillary electrophoresis

102 (ceI-PCR) to investigate how longitudinal and lateral eDNA detection probability and signal  
103 strength vary on a small scale (<20 m) between summer, fall, and winter, (i.e. high, medium,  
104 and low water levels) with up to 25-fold variations in discharge. Additionally, the longitudinal  
105 change in eDNA signal strength was examined at an intermediate scale (~1 km) for fish  
106 species of different size, but constant total biomass.

107

108

## 109 **Materials and Methods**

### 110 *Study site*

111 The three cage experiments took place in the Melach, a fish-free, glacier-fed, Alpine river in  
112 Lüsens, Tyrol (Latitude 47°7'0,32", Longitude 11°8'4,92", WGS1984) in August (22<sup>nd</sup>-26<sup>th</sup>)  
113 2016, November (21<sup>st</sup>-25<sup>th</sup>) 2016, and September (26<sup>th</sup>-29<sup>th</sup>) 2017. The Melach shows typical  
114 seasonal and daily fluctuations in discharge and sediment load associated with glacially  
115 influenced rivers in the Alps (Sertić Perić, Jolidon, Uehlinger, & Robinson, 2015). Following  
116 the European river zonation, the sampling site is located in the epirhithral of the river at an  
117 elevation of 1700 m a.s.l. Permanent fish populations cannot be established in this part of the  
118 river due to extreme discharge situations. Additionally, a transverse structure at the  
119 downstream end of the examined range prohibited potential upstream migration.

120

### 121 *Experimental design*

122 All handling of study animals conformed to Directive 2010/63/EU, and permission for field  
123 work was granted by the fishing area manager H. Raffl. Prior to the cage experiment, the  
124 absence of fish was confirmed via electrofishing, starting 1.3 km downstream at the  
125 transverse structure. For each of the three trials, two steel cages 1 × 1 × 0.6 m with “mesh”  
126 size of 10 mm and 5 mm, respectively, were installed at the same location in full current of  
127 the river for the duration of the experiment (four days), secured against drift, and equipped  
128 with a few stones to provide some natural structure. Four fish species were used in the  
129 experiment: A cyprinid species (Eurasian minnow – *Phoxinus phoxinus* L. 1758) was placed

130 in the cage with the narrow mesh size and three salmonid species (brown trout – *Salmo*  
131 *trutta* L. 1758, brook trout – *Salvelinus fontinalis* M. 1814, and rainbow trout – *Oncorhynchus*  
132 *mykiss* W. 1792) were placed in the other cage. On days two, three, and four of the  
133 experiment, 200 g fish per species (never less for salmonids) were placed in the cages,  
134 equalling two to five individuals per salmonid species and 40 to 90 *P. phoxinus* individuals. At  
135 the end of each sampling day, fish were removed from the cages and exchanged for new  
136 individuals. To prevent multiple use of individuals, fish were kept in separate tanks thereafter;  
137 in November the availability of *P. phoxinus* was limited and the same individuals were used  
138 throughout the experiment.

139 Two-liter water samples were used for the detection of fish eDNA. On the first day of  
140 each trial (prior to fish placement in cages), control samples were taken from at least five  
141 locations between the cage positions and the transverse structure. On days two, three, and  
142 four, water samples were taken daily at 13 locations downstream of the cages (1.3 km,  
143 555 m, 423 m, 323 m, 223 m, 130 m, 65 m, 33 m, 16.8 m, 8 m, 4 m, 2.5 m, and 0.5 m) at  
144 approximately the same daytime. Due to changes in the structure of the riverbed, the  
145 distance between the cages and the first seven transects sometimes varied one to two  
146 meters between experiments, which was accounted for during data analyses. At 0.5 m to  
147 130 m distance, two to four water samples were taken in transects, depending on the width  
148 of the river. Further downstream, only one sample was taken per location. In November, only  
149 two to three transect samples were taken due to limited discharge. Each day, sampling was  
150 carried out from the most downstream location moving upstream towards the cages. In  
151 September, two such sampling runs were carried out per day.

152 Water samples were collected right below the stream surface using 2 L wide-neck  
153 bottles, which were treated with chlorine bleach (3.6 g sodium hypochlorite per 100 g liquid)  
154 overnight and thoroughly washed using fish-DNA-free tap water. Filtration was carried out on  
155 500 ml filter towers with a peristaltic pump (Solinst; Model 410) and glass fibre filters with  
156 47 mm diameter (1.2 µm mesh width, Whatman GF/C) followed by storage at –80 °C until  
157 further processing. In case of filter clogging (high turbidity; only in August), up to three filters

158 were utilized per sample. During all water processing steps, DNA-free gloves were worn and  
159 frequently changed. All multi-use equipment was soaked in chlorine bleach for at least ten  
160 minutes between samples and thoroughly rinsed using MilliQ water. Forceps for filter  
161 handling were singed three times prior to each use. Every ten samples, 2 L of MilliQ water  
162 were filtered as negative controls to check for cross-contamination during fieldwork, whereas  
163 a sample from the fish transport container served as daily positive control.

164 Total discharge and its lateral differences were measured with a FlowTracker  
165 (Sontek, USA) during the August trial, and with salt and a TQ Tracer (Sommer Messtechnik,  
166 Austria) during the November and September trials. In August, discharge increased during  
167 the sampling time (10 AM to 5 PM) but remained longitudinally constant due to the strong  
168 glacial influence. Therefore, diurnal discharge was measured once and supported by point-  
169 measurements at 3 PM. In September and November, the inflow of side streams caused an  
170 increase along the 1.3 km sampling range, with hardly any changes in the course of a day.  
171 Hence, measurements were carried out daily directly at the cages, at 223 m, 555 m, and  
172 1,300 m downstream, and supported by a diurnal measurement per trial. Discharge at each  
173 water sampling point (in space and time) was extrapolated; no rainfall occurred during any of  
174 the sampling days. For all three trials, turbidity was measured with a turbidity meter using an  
175 infrared light source (AL250T-IR, Aqualytic, Germany). Water temperature, pH, conductivity,  
176 and oxygen saturation were obtained with a multi-parameter probe (WTW, Germany).

177

### 178 *Laboratory processing*

179 All molecular work was carried out in a clean-room laboratory at the University of Innsbruck  
180 (Austria) compliant with ancient-DNA processing standards. First, filters were lysed using  
181 190  $\mu$ L TES (0.1 M TRIS, 10mM EDTA, 2% sodium dodecyl sulphate; pH 8) and 10  $\mu$ L  
182 Proteinase K (VWR, 20 mg/mL) each, followed by incubation over-night on a rocking platform  
183 at 56°C. Then, filters were transferred to plastic inserts with a perforated bottom and  
184 centrifuged for 10 min at 14,000 rpm. The entire resulting lysate was extracted on the  
185 Biosprint 96 platform (QIAGEN) using a custom DNA-uptake protocol which combined the

186 DNA contained in up to 900  $\mu$ L lysate prior to extraction with the “BS 96 tissue protocol”  
187 according to the manufacturer’s instructions; except for elution in 100  $\mu$ L TE. Lysates of  
188 filters stemming from the same water sample were also combined during the uptake process.  
189 Each 96-well plate contained four extraction negative controls and all resulting eluates were  
190 stored at -32°C until further processing.

191 Target DNA was amplified using species-specific primers in endpoint PCRs coupled  
192 with capillary electrophoresis (cePCR). PCRs were run on Nexus Mastercyclers (Eppendorf),  
193 with each plate including at least one positive control (DNA extract from target species) and  
194 one negative control (molecular grade water). Previously published primers (Thalinger et al.,  
195 2016) and a newly developed primer pair for *S. trutta* (Table 1) were utilized. During PCR  
196 optimization, primers were tested for specificity against other fish species and aquatic  
197 invertebrates occurring in Central European freshwaters (Thalinger et al., 2016). Additionally,  
198 we specified assay sensitivity following Sint et al. (2012): reliable positive amplifications were  
199 possible for all primer pairs from 10 DNA ds. Each 10  $\mu$ L PCR master mix contained  
200 1  $\times$  Multiplex reaction mix (QIAGEN), 0.5  $\mu$ M of each primer, 30 mM TMAC, 5  $\mu$ g BSA  
201 (Bovine Serum Albumin) and 3.2  $\mu$ L DNA extract. Optimized thermocycling conditions were:  
202 denaturation at 95°C for 15 min, 35 cycles of 94°C for 30 s, 64°C (66°C for *P. phoxinus*) for  
203 3 min and 72°C for 60 s followed by final elongation at 72°C for 10 min. Target DNA signal  
204 strength was determined via capillary electrophoresis on the QIAxcel (Qiagen) with the  
205 associated software QIAxcel Screengel version 1.6.0.10 using the method AM320-30s. The  
206 fluorescent signal measured in relative fluorescence units (RFUs) was used as a semi-  
207 quantitative measure of target DNA (Thalinger et al., 2019) and signals  $\geq 0.08$  RFU were  
208 deemed positive. To verify the applicability of this approach, 40 samples positive for *S. trutta*  
209 were re-tested with droplet digital PCR (SI 1). All extraction and PCR negative controls  
210 resulted negative, however, in the August and the November trial six of 16 negative controls  
211 showed low levels of contamination ( $\leq 0.2$  RFU), hence, fluorescence values of potentially  
212 affected field samples were down-corrected by the respective values.

213



## 214 *Statistical analysis*

215 All data were analyzed in R (R Core Team, 2019) and visualized with “ggplot2” (Wickham,  
216 2016), “ggpubr” (Kassambara, 2019), and “viridis” (Garnier, 2018). We generated eDNA  
217 heatmaps per fish cage, i.e. for salmonids and *P. phoxinus*, for each of the three trials up to  
218 20 m and 65 m downstream distance. The lateral distance from the orographically left shore  
219 (x), the longitudinal distance from the respective cage (y) and mean RFUs (z) were used for  
220 the linear interpolation of irregular gridded data with the “akima” package (Akima & Gebhardt,  
221 2016). eDNA signals were not extrapolated towards the edge of the water body and RFUs  
222 were interpolated on a 5 × 5 cm grid. To identify the distance at which lateral eDNA  
223 distribution was homogenous, salmonid RFUs were tested for normal distribution with a  
224 Shapiro-Wilk-test, followed by Kruskal-Wallis-tests per transect and trial. Hence, only data  
225 with downstream distances  $\geq 130$  m were used for the subsequent analyses. Differences in  
226 detection rates and eDNA signal strengths amongst salmonid species were examined per  
227 trial with Z-tests and Kruskal-Wallis tests, respectively; p-values were Holm-Sidak-corrected.  
228 No differences in detection rates and eDNA signal strength were detected, thus salmonid  
229 samples remained pooled for subsequent analyses. The same tests were applied comparing  
230 detection rates and signal strength between *P. phoxinus* and the salmonids per trial. For all  
231 tests of eDNA signal strength, only samples testing positive were taken into account, as non-  
232 detections in this case were random and can be attributed to the sampling process  
233 (Hagenaars & McCutcheon, 2002).

234 The relationship between RFUs and downstream distance from the cages was  
235 examined by fitting Linear Mixed-Effects Models (function “lmer”; package “nlme” (Pinheiro,  
236 Bates, DebRoy, Sarkar, & R Core Team, 2020)). To account for a) the non-linear relationship  
237 between RFUs and absolute target copy numbers, b) the influence of discharge and c) a  
238 non-normal data distribution, RFUs were exponentiated, divided by the respective discharge,  
239 and subsequently ln-transformed. Downstream distances were also ln-transformed and after  
240 initial inspection, data obtained in August were not included (see Results). The  
241 environmental variables turbidity (0 – 1.055 NTU), oxygen saturation (10.11 – 11.25 mg/L),

242 water temperature (4.2 – 7.3°C), conductivity (49.3 – 69.2  $\mu\text{S}/\text{cm}$ ) and pH (7.45 – 7.6) were  
243 also not included as their fluctuations were considered negligible. Linear-Mixed-Effects  
244 models were built starting with an intercept-only model and gradually including fixed effect  
245 (distance) and random effects (month and fish family; Table 2). Model fit was compared by  
246 AIC and BIC and changes in Log Likelihood Ratios (see SI 2 for the complete R code).

247

248

## 249 **Results**

250 Altogether, 306 water samples were analyzed: 84, 168, and 54 from the August, September,  
251 and November trial, respectively and average discharge during sampling 0-20 m downstream  
252 of the cages was 835 L/s in August, 174 L/s in September, and 61 L/s in November. Fifty  
253 percent of the 1,224 PCRs resulted positive for one of the four fish species with the majority  
254 of detections occurring in September and November. Heatmaps of eDNA signals up to 20 m  
255 downstream of the cages revealed eDNA plumes below the respective fish cage and much  
256 weaker or no signals at small lateral distances of ~1 m (Fig. 2). In August, cages were  
257 placed in the center of the stream and positive samples within 20 m distance were almost  
258 exclusively obtained from sampling points with no lateral offset (Fig. 1 and 2). In September,  
259 the main water flow out of the salmonid cage was observed towards the orographically right  
260 edge of the river; the main water flow from the *P. phoxinus* cage was on the opposite side.  
261 This situation was mirrored by high target eDNA signals downstream of the respective cage,  
262 and low eDNA signals at the opposite sides. In November, eDNA signals were highest for  
263 both salmonids and *P. phoxinus* and albeit the eDNA distribution pattern was similar to  
264 September, lateral differences decreased at smaller downstream distance (Fig. 2).

265 At 130 m distance from the cages, salmonid signals were laterally homogenous  
266 during all three trials ( $p_{\text{corr}} > 0.05$ ). The eDNA signals from 130 m to 1.3 km downstream  
267 distance displayed distinct patterns: in August, only few samples resulted positive with low  
268 values for both *P. phoxinus* (0.25 RFU  $\pm$  0.16 RFU SD) and the salmonids (0.23 RFU  $\pm$  0.3  
269 RFU SD); discharge and eDNA signal strength did not show distinct longitudinal changes

270 (Fig. 3). In September, signals remained at a similar level for *P. phoxinus* (0.34 RFU  $\pm$  0.23  
271 RFU SD) and salmonids (0.27 RFU  $\pm$  0.15 RFU SD). In November, mean *P. phoxinus* eDNA  
272 signals were highest (0.34 RFU  $\pm$  0.22 RFU SD), and salmonid signals remained similar to  
273 September (0.23 RFU  $\pm$  0.21 RFU SD). The longitudinal increase in discharge was similar in  
274 September and November with a 2.1-fold increase from 201 L/s to 335 L/s and a 2.7-fold  
275 increase from 71 L/s to 167 L/s, respectively. Discharge-corrected eDNA signals of  
276 *P. phoxinus* and the salmonids showed a stronger decline along the sampling range in  
277 November (Fig. 3). Of the samples for which a homogenous lateral eDNA distribution was  
278 expected, 57% of the PCRs were positive for *P. phoxinus* and 25% were positive for  
279 salmonid species in August. In September and November, all *P. phoxinus* PCRs resulted  
280 positive in comparison to  $\sim$ 2/3 of the salmonid reactions (Fig. 4). These differences were  
281 significant in August ( $\text{Chi}^2 = 5.79$ ,  $p_{\text{corr}} < 0.05$ ) and September ( $\text{Chi}^2 = 13.62$ ,  $p_{\text{corr}} < 0.001$ ).  
282 Additionally, eDNA signal strength in November was significantly higher for *P. phoxinus*  
283 compared to the salmonids ( $W = 635.5$ ,  $p_{\text{corr}} < 0.01$ ; Fig. 4).

284         Of the six Linear Mixed-Effects models fitted to September and November eDNA  
285 signals, model “e” containing ln-transformed distance as fixed effect and the random effects  
286 month (random slope and intercept per trial) and fish family (random intercept only) best  
287 described the data (Table 3 and 4). Model “f”, additionally containing random slopes per fish  
288 family and month (Figure 4; bottom panel), resulted in a higher BIC and the change in log-  
289 likelihood was not significant between the two models. Model “e” confirmed a significant  
290 ( $p < 0.001$ ) negative relationship between eDNA signals and downstream distance after  
291 correcting for changes in discharge (Table 4). Permitting different eDNA signal strengths at  
292 the upper end of the examined range between months and between fish families within each  
293 month proved vital for model fit; the same was true for incorporating the variation in eDNA  
294 signal decline between months.

295

296

297 **Discussion**

298 Our results demonstrate profound spatio-temporal changes in eDNA distribution induced by  
299 seasonal discharge conditions. Lateral and longitudinal extent of the eDNA plumes  
300 downstream of the caged fish mirrored their position inside the river and at higher discharge,  
301 lateral mixing occurred further downstream. Additionally, the small-sized *P. phoxinus*  
302 individuals emitted a significantly stronger eDNA signal than the larger salmonid individuals  
303 at low discharge in November. Along the 1.3 km flow path, discharge-corrected eDNA  
304 signals declined significantly and this effect was most pronounced in November.

305 The eDNA signals recorded at a small lateral and longitudinal scale (<20 m) coincide  
306 with previous results describing a plume-shaped distribution of eDNA downstream of the  
307 source (Laporte et al., 2020; Wilcox, McKelvey, Young, Lowe, & Schwartz, 2015; Wood et  
308 al., 2020). Additionally, the position of the salmonid and *P. phoxinus* plume mirrored the  
309 lateral position of the respective cage when these were not aligned in flow direction in  
310 September and November. This finding complicates the interpretation of field-derived eDNA  
311 results when local conditions differ across the wetted width because individual species prefer  
312 specific micro habitats and this choice is furthermore affected by hydrological conditions (e.g.  
313 seeking shelter from high flow velocities) (Aarts & Nienhuis, 2003). Based on our  
314 experimental setup with constant fish biomasses, it was not possible to confirm the results of  
315 Wood et al. (2020) who found that the release of higher eDNA quantities increases detection  
316 probability at higher lateral distance. However, our data show a comparable effect induced  
317 by lower discharge and slower flow velocities (Wondzell, Gooseff, & McGlynn, 2007) at  
318 constant fish biomass. Future studies examining lateral and longitudinal eDNA distribution  
319 should therefore take biomass-induced variations and hydrological effects into account.

320 The salmonids (average individual mass 101 g) had lower detection probabilities and  
321 lower eDNA signals than *P. phoxinus* (average individual mass 3.5 g) at similar total  
322 biomass. eDNA and biomass in most cases exhibit a positive relationship in controlled and  
323 natural settings (e.g. Lacoursière-Roussel, Rosabal, & Bernatchez, 2016; Takahara,  
324 Minamoto, Yamanaka, Doi, & Kawabata, 2012; Thalinger et al., 2019), but the influence of  
325 fish size is not well studied. Maruyama et al. (2014) found elevated levels of eDNA release

326 per gram in juvenile fish, but attributed this effect to higher metabolic activity (Vinberg, 1960).  
327 In the present study, several scenarios can explain the difference in detection probability and  
328 signal strength: the *P. phoxinus* individuals, albeit mostly not juvenile, could indeed have had  
329 higher metabolic rates, which are common for smaller fish species (Clarke & Johnston,  
330 1999). The increased surface to volume ratio of the smaller fish is another potential  
331 explanation as more *P. phoxinus* surface was exposed to the water flow. The eDNA release  
332 rates could generally differ between cyprinids and salmonids, which also exhibit structural  
333 and physiological differences (Freyhof & Kottelat, 2007). The salmonids were definitely better  
334 adapted to the high flow conditions within the cages in August when some *P. phoxinus* did  
335 not survive the exposure to 1,500 L/s discharge. However, the difference in eDNA signal  
336 strength was most pronounced in November at ~60 L/s. It is unlikely that the effect was  
337 induced by the species-specific primers, as detection patterns and signal strength did not  
338 differ within the salmonids and the PCR assays were extensively tested for specificity and  
339 equal sensitivity (Sint et al., 2012; Thalinger et al., 2016). Most likely, the effect is a  
340 combination of the aforementioned physiological differences and could be even stronger  
341 when fish are compared to other aquatic groups such as amphibians, mussels, or crayfish  
342 (Bedwell & Goldberg, 2020; Robinson, Uren Webster, Cable, James, & Consuegra, 2018;  
343 Wacker et al., 2019).

344 As expected for glacier-fed Alpine rivers and streams, discharge changed substantially  
345 (25-fold) between trials (Bard et al., 2015). The associated diluting effect was clearly visible  
346 from eDNA signal strengths directly downstream of the cages: average *P. phoxinus* signals  
347 at this location ranged from 0.15 RFU in August to 1.27 RFU in November. Few of the  
348 samples taken at high discharge >1,000 L/s tested positive, but in this situation the 200 g fish  
349 mass per species were less than 0.2 ‰ of the passing water mass. The summer situation  
350 was most challenging to examine because discharge and turbidity increased quickly from  
351 morning (~270 L/s and ~22 NTU) to afternoon (~1,100 L/s and ~130 NTU). In contrast to  
352 classic fish monitoring via electrofishing, where sampling in such harsh conditions is not  
353 feasible, eDNA-based methods are not restricted to low flow conditions outside of protected

354 periods and spawning seasons. Based on our results, spring and summer sampling in  
355 glacier-fed Alpine rivers should, however, not take place at high discharge in the afternoon  
356 and evening and is also not advisable during floods and after strong rainfalls. In September  
357 and November discharge remained almost constant over time, but side streams led to a  
358 more than 2-fold increase within the examined 1.3 km range. So far, most eDNA studies only  
359 discuss this factor (Harrison et al., 2019; Laramie, Pilliod, & Goldberg, 2015; Wood et al.,  
360 2020) even though the incorporation of these dilution effects was vital for our analysis.

361 After controlling for the changing discharge, the eDNA signals of both *P. phoxinus* and  
362 the salmonids declined with increasing distance as expected from previous work on eDNA  
363 deposition and degradation (Harrison et al., 2019). At constant longitudinal and temporal  
364 discharge, average transport distance ( $S_p$ ) and depositional velocity ( $v_{dep}$ ) are used to  
365 describe eDNA deposition (Pont et al., 2018; Shogren et al., 2017; Wilcox et al., 2016). The  
366 calculation of  $v_{dep}$  relies on flow velocity and depth data, which can fluctuate considerably in  
367 natural and semi-natural rivers and are directly influenced by discharge. Therefore, we  
368 refrained from calculating this factor.  $S_p$  is commonly described as the slope parameter of a  
369 first order exponential decline  $S_p = 1/k$  (but also see Wood et al., 2020). In our case this  
370 would result in an average transport distance of ~1,800 m and ~930 m for *P. phoxinus* eDNA  
371 in September and November, respectively (based on data from locations with homogenous  
372 lateral eDNA distribution) and confirm the positive correlation between river size in general  
373 and transport distance (Deiner & Altermatt, 2014; Jane et al., 2015; Pont et al., 2018;  
374 Shogren et al., 2017). However,  $S_p$  is non-generalizable between streams (Harrison et al.,  
375 2019) and thus of limited use outside a systematic framework incorporating the complex flow  
376 regime of Alpine rivers.

377 Our work aids to the understanding of how eDNA signals obtained from field-collected  
378 samples can be interpreted for species monitoring and conservation. Sampling campaigns  
379 carried out in dynamic habitats such as Alpine rivers and streams need to account for the  
380 heterogenous lateral eDNA distribution, adapt the sampling scheme to habitat preferences of  
381 the target species, and address the prevailing discharge situation. In a best-case scenario,

382 the target species has distinct habitat preferences, and discharge is low and constant during  
383 the entire sampling period. Then, eDNA quantities measured directly downstream of suitable  
384 habitats are likely to be directly correlated with local target species biomass (Hinlo,  
385 Lintermans, Gleeson, Broadhurst, & Furlan, 2018). Otherwise, only discharge measurements  
386 at each sampling location can prevent flawed inferences (Thalinger et al., 2019). The  
387 detection of rare species, however, is best accomplished by determining a suitable distance  
388 between sampling points and preliminary investigations of the respective eDNA shedding  
389 rates (cp. Wood et al., 2020). The population densities and the position of individuals within  
390 lotic systems should not be inferred from eDNA signals without any *a priori* knowledge on  
391 local hydrology. Comparisons between species are also not advisable without previous tests  
392 under controlled conditions. Therefore, we advocate for the reporting of the sampling  
393 position, local discharge, time, and species biology during field sampling. In the future, these  
394 data can be incorporated in hydrological models specifically designed for eDNA-based  
395 species monitoring.

396

397

### 398 **Acknowledgements**

399 This research was conducted within the eDNA-Alpfish project funded by the Austria  
400 Research Promotion Agency (FFG); project number 853219. We thank F. Drewes for his  
401 extraordinary patience, support and organisational skills during setting up the cages, fish  
402 handling, and discharge measurements in the face of non-existent mobile reception. We are  
403 grateful to H. Raffl for letting us conduct the experiments in his fishing area and M. Böcker for  
404 supporting this work with her graphic skills.

405

406

### 407 **Conflict of interest**

408 MT is the co-founder of Sinsoma GmbH, a for profit company dedicated to DNA analyses in  
409 environmental studies; DK is employed by Sinsoma. CM and RS are co-founders of the  
410 ARGE Limnologie GesmbH, a for profit consultancy specialized in aquatic ecology.

411

412

#### 413 **Author contributions**

414 MT, JW, CM, and RS conceived the study; the experiment was designed by BT, MT, RS, and  
415 CM. Data were acquired and analyzed by BT, DK, and YP. BT wrote the first draft of the  
416 manuscript which was revised by DK, YP, JW, and MT.

417

418

#### 419 **Data Archiving Statement**

420 All data on fish, discharge, eDNA signals, environmental conditions, sampling and  
421 comparison between celPCR and ddPCR have been uploaded to Figshare and are available  
422 at <https://doi.org/10.6084/m9.figshare.12380642.v1>



423 **References**

- 424 Aarts, B. G. W., & Nienhuis, P. H. (2003). Fish zonation and guilds as the basis for  
425 assessment of ecological integrity of large rivers. In *Aquatic Biodiversity* (pp. 157–178).  
426 [https://doi.org/10.1007/978-94-007-1084-9\\_11](https://doi.org/10.1007/978-94-007-1084-9_11)
- 427 Akima, H., & Gebhardt, A. (2016). *akima: Interpolation of Irregularly and Regularly Spaced*  
428 *Data*. Retrieved from <https://cran.r-project.org/package=akima>
- 429 Bard, A., Renard, B., Lang, M., Giuntoli, I., Korck, J., Koboltschnig, G., ... Volken, D. (2015).  
430 Trends in the hydrologic regime of Alpine rivers. *Journal of Hydrology*, *529*, 1823–1837.  
431 <https://doi.org/10.1016/j.jhydrol.2015.07.052>
- 432 Barnes, M. A., & Turner, C. R. (2016). The ecology of environmental DNA and implications  
433 for conservation genetics. *Conservation Genetics*, *17*(1), 1–17.  
434 <https://doi.org/10.1007/s10592-015-0775-4>
- 435 Bedwell, M. E., & Goldberg, C. S. (2020). Spatial and temporal patterns of environmental  
436 DNA detection to inform sampling protocols in lentic and lotic systems. *Ecology and*  
437 *Evolution*, *10*(3), 1602–1612. <https://doi.org/10.1002/ece3.6014>
- 438 Beng, K. C., & Corlett, R. T. (2020). Applications of environmental DNA (eDNA) in ecology  
439 and conservation: opportunities, challenges and prospects. *Biodiversity and*  
440 *Conservation*, Vol. 29, pp. 2089–2121. <https://doi.org/10.1007/s10531-020-01980-0>
- 441 Cardinale, B. J., Duffy, J. E., Gonzalez, A., Hooper, D. U., Perrings, C., Venail, P., ...  
442 Naeem, S. (2012). Biodiversity loss and its impact on humanity. *Nature*, Vol. 486, pp.  
443 59–67. <https://doi.org/10.1038/nature11148>
- 444 Carim, K. J., Caleb Dysthe, J., McLellan, H., Young, M. K., McKelvey, K. S., & Schwartz, M.  
445 K. (2019). Using environmental DNA sampling to monitor the invasion of nonnative *Esox*  
446 *lucius* (northern pike) in the Columbia River basin, USA. *Environmental DNA*, *1*(3), 215–  
447 226. <https://doi.org/10.1002/edn3.22>
- 448 Clarke, A., & Johnston, N. M. (1999). Scaling of metabolic rate with body mass and  
449 temperature in teleost fish. *Journal of Animal Ecology*, *68*(5), 893–905.  
450 <https://doi.org/10.1046/j.1365-2656.1999.00337.x>

- 451 Deiner, K., & Altermatt, F. (2014). Transport distance of invertebrate environmental DNA in a  
452 natural river. *PLOS ONE*, 9(2). <https://doi.org/10.1371/journal.pone.0088786>
- 453 Deiner, K., Bik, H. M., Mächler, E., Seymour, M., Lacoursière-Roussel, A., Altermatt, F., ...  
454 Bernatchez, L. (2017). Environmental DNA metabarcoding: Transforming how we  
455 survey animal and plant communities. *Molecular Ecology*, 26(21), 5872–5895.  
456 <https://doi.org/10.1111/mec.14350>
- 457 Deiner, K., Fronhofer, E. A., Mächler, E., Walser, J. C., & Altermatt, F. (2016). Environmental  
458 DNA reveals that rivers are conveyor belts of biodiversity information. *Nature*  
459 *Communications*, 7. <https://doi.org/10.1038/ncomms12544>
- 460 Doi, H., Inui, R., Akamatsu, Y., Kanno, K., Yamanaka, H., Takahara, T., & Minamoto, T.  
461 (2017). Environmental DNA analysis for estimating the abundance and biomass of  
462 stream fish. *Freshwater Biology*, 62(1), 30–39. <https://doi.org/10.1111/fwb.12846>
- 463 Evans, N. T., Shirey, P. D., Wieringa, J. G., Mahon, A. R., & Lamberti, G. A. (2017).  
464 Comparative Cost and Effort of Fish Distribution Detection via Environmental DNA  
465 Analysis and Electrofishing. *Fisheries*, 42(2), 90–99.  
466 <https://doi.org/10.1080/03632415.2017.1276329>
- 467 Faulks, L. K., Gilligan, D. M., & Beheregaray, L. B. (2011). The role of anthropogenic vs.  
468 natural in-stream structures in determining connectivity and genetic diversity in an  
469 endangered freshwater fish, Macquarie perch (*Macquaria australasica*). *Evolutionary*  
470 *Applications*, 4(4), 589–601. <https://doi.org/10.1111/j.1752-4571.2011.00183.x>
- 471 Fette, M., Weber, C., Peter, A., & Wehrli, B. (2007). Hydropower production and river  
472 rehabilitation: A case study on an alpine river. *Environmental Modeling & Assessment*.  
473 Retrieved from <https://doi.org/10.1007/s10666-006-9061-7>
- 474 Fremier, A. K., Strickler, K. M., Parzych, J., Powers, S., & Goldberg, C. S. (2019). Stream  
475 Transport and Retention of Environmental DNA Pulse Releases in Relation to  
476 Hydrogeomorphic Scaling Factors. *Environmental Science and Technology*, 53(12),  
477 6640–6649. <https://doi.org/10.1021/acs.est.8b06829>
- 478 Freyhof, J., & Kottelat, M. (2007). Handbook of European freshwater fishes . In *Ichthyological*

- 479            *Research* (Vol. 55). <https://doi.org/10.1007/s10228-007-0012-3>
- 480 Garnier, S. (2018). *viridis: Default Color Maps from "matplotlib."* Retrieved from [https://cran.r-](https://cran.r-project.org/package=viridis)
- 481            [project.org/package=viridis](https://cran.r-project.org/package=viridis)
- 482 Hagenaaars, J. A., & McCutcheon, A. L. (2002). Applied Latent Calss Analysis. In J. A.
- 483            Hagenaaars & A. L. McCutcheon (Eds.), *Applied Latent Class Analysis*. Edinburgh:
- 484            Cambridge University Press.
- 485 Harper, L. R., Griffiths, N. P., Lawson Handley, L., Sayer, C. D., Read, D. S., Harper, K. J.,
- 486            ... Hänfling, B. (2019). Development and application of environmental DNA surveillance
- 487            for the threatened crucian carp ( *Carassius carassius* ). *Freshwater Biology*, *64*(1), 93–
- 488            107. <https://doi.org/10.1111/fwb.13197>
- 489 Harrison, J. B., Sunday, J. M., & Rogers, S. M. (2019). Predicting the fate of eDNA in the
- 490            environment and implications for studying biodiversity. *Proceedings of the Royal Society*
- 491            *B: Biological Sciences*, Vol. 286. <https://doi.org/10.1098/rspb.2019.1409>
- 492 Hinlo, R., Lintermans, M., Gleeson, D., Broadhurst, B., & Furlan, E. (2018). Performance of
- 493            eDNA assays to detect and quantify an elusive benthic fish in upland streams. *Biological*
- 494            *Invasions*, *20*(11), 3079–3093. <https://doi.org/10.1007/s10530-018-1760-x>
- 495 Jane, S. F., Wilcox, T. M., Mckelvey, K. S., Young, M. K., Schwartz, M. K., Lowe, W. H., ...
- 496            Whiteley, A. R. (2015). Distance, flow and PCR inhibition: EDNA dynamics in two
- 497            headwater streams. *Molecular Ecology Resources*, *15*(1), 216–227.
- 498            <https://doi.org/10.1111/1755-0998.12285>
- 499 Jetz, W., McGeoch, M. A., Guralnick, R., Ferrier, S., Beck, J., Costello, M. J., ... Turak, E.
- 500            (2019). Essential biodiversity variables for mapping and monitoring species populations.
- 501            *Nature Ecology and Evolution*, Vol. 3, pp. 539–551. [https://doi.org/10.1038/s41559-019-](https://doi.org/10.1038/s41559-019-0826-1)
- 502            [0826-1](https://doi.org/10.1038/s41559-019-0826-1)
- 503 Kassambara, A. (2019). *ggpubr: "ggplot2" Based Publication Ready Plots*. Retrieved from
- 504            <https://cran.r-project.org/package=ggpubr>
- 505 Lacoursière-Roussel, A., Rosabal, M., & Bernatchez, L. (2016). Estimating fish abundance
- 506            and biomass from eDNA concentrations: variability among capture methods and

- 507 environmental conditions. *Molecular Ecology Resources*, 16(6), 1401–1414.  
508 <https://doi.org/10.1111/1755-0998.12522>
- 509 Laporte, M., Bougas, B., Côté, G., Champoux, O., Paradis, Y., Morin, J., & Bernatchez, L.  
510 (2020). Caged fish experiment and hydrodynamic bidimensional modeling highlight the  
511 importance to consider 2D dispersion in fluvial environmental DNA studies.  
512 *Environmental DNA*, edn3.88. <https://doi.org/10.1002/edn3.88>
- 513 Laramie, M. B., Pilliod, D. S., & Goldberg, C. S. (2015). Characterizing the distribution of an  
514 endangered salmonid using environmental DNA analysis. *Biological Conservation*, 183,  
515 29–37. <https://doi.org/10.1016/j.biocon.2014.11.025>
- 516 Levi, T., Allen, J. M., Bell, D., Joyce, J., Russell, J. R., Tallmon, D. A., ... Yu, D. W. (2019).  
517 Environmental DNA for the enumeration and management of Pacific salmon. *Molecular*  
518 *Ecology Resources*, 19(3), 597–608. <https://doi.org/10.1111/1755-0998.12987>
- 519 Maruyama, A., Nakamura, K., Yamanaka, H., Kondoh, M., & Minamoto, T. (2014). The  
520 release rate of environmental DNA from juvenile and adult fish. *PLoS ONE*, 9(12).  
521 <https://doi.org/10.1371/journal.pone.0114639>
- 522 Pinheiro, J., Bates, D., DebRoy, S., Sarkar, D., & R Core Team. (2020). *nlme: Linear and*  
523 *Nonlinear Mixed Effects Models*. Retrieved from <https://cran.r-project.org/package=nlme>
- 524 Pont, D., Rocle, M., Valentini, A., Civade, R., Jean, P., Maire, A., ... Dejean, T. (2018).  
525 Environmental DNA reveals quantitative patterns of fish biodiversity in large rivers  
526 despite its downstream transportation. *Scientific Reports*, 8(1).  
527 <https://doi.org/10.1038/s41598-018-28424-8>
- 528 R Core Team. (2019). *R: A Language and Environment for Statistical Computing*. Retrieved  
529 from <https://www.r-project.org/>
- 530 Robinson, C. V., de Leaniz, C. G., & Consuegra, S. (2019). Effect of artificial barriers on the  
531 distribution of the invasive signal crayfish and Chinese mitten crab. *Scientific Reports*,  
532 9(1), 1–11. <https://doi.org/10.1038/s41598-019-43570-3>
- 533 Robinson, C. V., Uren Webster, T. M., Cable, J., James, J., & Consuegra, S. (2018).  
534 Simultaneous detection of invasive signal crayfish, endangered white-clawed crayfish

- 535 and the crayfish plague pathogen using environmental DNA. *Biological Conservation*,  
536 222, 241–252. <https://doi.org/10.1016/j.biocon.2018.04.009>
- 537 Sales, N. G., McKenzie, M. B., Drake, J., Harper, L. R., Browett, S. S., Coscia, I., ...  
538 McDevitt, A. D. (2020). Fishing for mammals: Landscape-level monitoring of terrestrial  
539 and semi-aquatic communities using eDNA from riverine systems. *Journal of Applied*  
540 *Ecology*, 57(4), 707–716. <https://doi.org/10.1111/1365-2664.13592>
- 541 Sertić Perić, M., Jolidon, C., Uehlinger, U., & Robinson, C. T. (2015). Long-term ecological  
542 patterns of alpine streams: An imprint of glacial legacies. *Limnology and Oceanography*,  
543 60(3), 992–1007. <https://doi.org/10.1002/lno.10069>
- 544 Settele, J., Scholes, R., Betts, R. A., Bunn, S., Leadley, P., Nepstad, D., ... Winter, M.  
545 (2015). Terrestrial and Inland water systems. In *Climate Change 2014 Impacts,*  
546 *Adaptation and Vulnerability: Part A: Global and Sectoral Aspects* (pp. 271–360).  
547 <https://doi.org/10.1017/CBO9781107415379.009>
- 548 Shogren, A. J., Tank, J. L., Andruszkiewicz, E., Olds, B., Mahon, A. R., Jerde, C. L., &  
549 Bolster, D. (2017). Controls on eDNA movement in streams: Transport, Retention, and  
550 Resuspension /704/158/2464 /704/242 /45/77 article. *Scientific Reports*, 7(1).  
551 <https://doi.org/10.1038/s41598-017-05223-1>
- 552 Sint, D., Raso, L., & Traugott, M. (2012). Advances in multiplex PCR: Balancing primer  
553 efficiencies and improving detection success. *Methods in Ecology and Evolution*, 3(5),  
554 898–905. <https://doi.org/10.1111/j.2041-210X.2012.00215.x>
- 555 Takahara, T., Minamoto, T., Yamanaka, H., Doi, H., & Kawabata, Z. (2012). Estimation of  
556 fish biomass using environmental DNA. *PLoS ONE*, 7(4), 3–10.  
557 <https://doi.org/10.1371/journal.pone.0035868>
- 558 Thalinger, B., Oehm, J., Mayr, H., Obwexer, A., Zeisler, C., & Traugott, M. (2016). Molecular  
559 prey identification in Central European piscivores. *Molecular Ecology Resources*, 16(1),  
560 123–137. <https://doi.org/10.1111/1755-0998.12436>
- 561 Thalinger, B., Wolf, E., Traugott, M., & Wanzenböck, J. (2019). Monitoring spawning  
562 migrations of potamodromous fish species via eDNA. *Scientific Reports*, 9(1).

- 563 <https://doi.org/10.1038/s41598-019-51398-0>
- 564 Thomsen, P. F., & Willerslev, E. (2015). Environmental DNA - An emerging tool in  
565 conservation for monitoring past and present biodiversity. *Biological Conservation*, 183,  
566 4–18. <https://doi.org/10.1016/j.biocon.2014.11.019>
- 567 Tickner, D., Opperman, J. J., Abell, R., Acreman, M., Arthington, A. H., Bunn, S. E., ...  
568 Young, L. (2020). Bending the Curve of Global Freshwater Biodiversity Loss: An  
569 Emergency Recovery Plan. *BioScience*, 70(4), 330–342.  
570 <https://doi.org/10.1093/biosci/biaa002>
- 571 Vinberg, G. G. (1960). *Rate of Metabolism and Food Requirements of Fishes*. Nanaimo,  
572 B.C.: Distributed by the Fisheries Research Board of Canada, Biological Station  
573 (1960).
- 574 Wacker, S., Fossøy, F., Larsen, B. M., Brandsegg, H., Sivertsgård, R., & Karlsson, S. (2019).  
575 Downstream transport and seasonal variation in freshwater pearl mussel ( *Margaritifera*  
576 *margaritifera* ) eDNA concentration. *Environmental DNA*, 1(1), 64–73.  
577 <https://doi.org/10.1002/edn3.10>
- 578 Wickham, H. (2016). *ggplot2: Elegant Graphics for Data Analysis*. Retrieved from  
579 <https://ggplot2.tidyverse.org>
- 580 Wilcox, T. M., McKelvey, K. S., Young, M. K., Lowe, W. H., & Schwartz, M. K. (2015).  
581 Environmental DNA particle size distribution from Brook Trout (*Salvelinus fontinalis*).  
582 *Conservation Genetics Resources*, 7(3), 639–641. [https://doi.org/10.1007/s12686-015-](https://doi.org/10.1007/s12686-015-0465-z)  
583 0465-z
- 584 Wilcox, T. M., McKelvey, K. S., Young, M. K., Sepulveda, A. J., Shepard, B. B., Jane, S. F.,  
585 ... Schwartz, M. K. (2016). Understanding environmental DNA detection probabilities: A  
586 case study using a stream-dwelling char *Salvelinus fontinalis*. *Biological Conservation*,  
587 194, 209–216. <https://doi.org/10.1016/j.biocon.2015.12.023>
- 588 Willett, S. D., McCoy, S. W., Taylor Perron, J., Goren, L., & Chen, C. Y. (2014). Dynamic  
589 reorganization of River Basins. *Science*, 343(6175).  
590 <https://doi.org/10.1126/science.1248765>

- 591 Wondzell, S. M., Gooseff, M. N., & McGlynn, B. L. (2007). Flow velocity and the hydrologic  
592 behavior of streams during baseflow. *Geophysical Research Letters*, 34(24), L24404.  
593 <https://doi.org/10.1029/2007GL031256>
- 594 Wood, Z. T., Erdman, B. F., York, G., Trial, J. G., & Kinnison, M. T. (2020). Experimental  
595 assessment of optimal lotic eDNA sampling and assay multiplexing for a critically  
596 endangered fish. *Environmental DNA*, edn3.64. <https://doi.org/10.1002/edn3.64>
- 597

598 **Table 1:** Primer pairs used for the molecular analysis of the eDNA samples.

| Species                    | Primer name   | 5' - 3'                     | Target gene | Fragment length (bp) | Reference             |
|----------------------------|---------------|-----------------------------|-------------|----------------------|-----------------------|
| <i>Phoxinus phoxinus</i>   | Pho-Pho-S639  | CGTGCAGAAGCGGATATAAATAC     | 16s         | 128                  | Thalinger et al. 2016 |
|                            | Pho-Pho-A648  | CCAACCGAAGGTAAAGTCTTATTG    |             |                      |                       |
| <i>Salvelinus sp.</i>      | Sal-vel-S651  | ATAGTCGGCACC GCCCTT         | COI         | 112                  | Thalinger et al. 2016 |
|                            | Sal-vel-A651  | TAACGAAGGCATGGGCTGTT        |             |                      |                       |
| <i>Oncorhynchus mykiss</i> | Onc-myk-S655  | TCTCCCTTCATTTAGCTGGAATC     | COI         | 82                   | Thalinger et al. 2016 |
|                            | Onc-myk-A655  | GCTGGAGGTTTTATGTTAATAATGGTC |             |                      |                       |
| <i>Salmo trutta</i>        | Sal-tru-S1002 | TCTCTTGATTCGGGCAGAACTC      | COI         | 89                   |                       |
|                            | Sal-tru-A1002 | CGAAGGCATGGGCTGTAACA        |             |                      |                       |

599

600 The respective target taxon, primer sequence, target gene, fragment length in base pairs and the source for previously published primers are  
 601 displayed. Please note that the *Salvelinus sp.* primer pair was designed to amplify both *S. fontinalis* and *Salvelinus umbla*.

602



603 **Table 2:** The set of Linear Mixed-Effects models used to investigate the relationship between eDNA signals (RFU) and distance from the eDNA  
 604 source.

**# model description**

- 
- a  $\ln(\exp(\text{RFU})/\text{discharge}) \sim 1$
  - b  $\ln(\exp(\text{RFU})/\text{discharge}) \sim 1$ , random:  $\sim 1|\text{month}$
  - c  $\ln(\exp(\text{RFU})/\text{discharge}) \sim 1$ , random:  $\sim 1|\text{month}/\text{fish family}$
  - d  $\ln(\exp(\text{RFU})/\text{discharge}) \sim \ln(\text{distance})$ , random =  $\sim 1|\text{month}/\text{fish family}$
  - e  $\ln(\exp(\text{RFU})/\text{discharge}) \sim \ln(\text{distance})$ , random = list(month =  $\ln(\text{distance})$ , fish family =  $\sim 1$ )
  - f  $\ln(\exp(\text{RFU})/\text{discharge}) \sim \ln(\text{distance})$ , random = list(month =  $\ln(\text{distance})$ , fish family =  $\ln(\text{distance})$ )
- 

605

606 Model structure is displayed as coded for in R. a) is the intercept only model, b) contains random slope for month of trial, c) random slopes for trial  
 607 and fish families with each trial, d) introduces the fixed effect “ln-transformed discharge”, e) adds random slope per month, f) adds random slope  
 608 per month and fish family within each month.

609

610 **Table 3:** Comparison of Linear Mixed-Effects model performance during the stepwise building process.

| # | AIC    | BIC    | log-likelihood | sign. change in log-likelihood |
|---|--------|--------|----------------|--------------------------------|
| a | 311.13 | 317.66 | -153.57        |                                |
| b | 117.72 | 127.51 | -55.86         | <.0001                         |
| c | 104.85 | 121.16 | -47.4          | <.0001                         |
| d | -44.15 | -24.58 | 28.0           | <.0001                         |
| e | -80.23 | -54.13 | 48.12          | <.0001                         |
| f | -78.21 | -45.59 | 49.1           | 0.37                           |

611

612 The Akaike information criterion (AIC), Bayesian information criterion (BIC), log-Likelihood and it's change are used for comparison between  
 613 consecutive models (level of significance:  $p < 0.05$ ).

614 **Table 4:** Linear Mixed-Effects model describing the relationship between eDNA signals and downstream distance.

| <b>Random effects</b>   | parameter estimate | lower 95% CI | upper 95% CI | <b>Fixed effects</b> | parameter estimate | lower 95% CI | upper 95% CI | se   | t-value | p-value | <b>Estimated deviation</b> | random effect              | intercept | ln(distance) |
|-------------------------|--------------------|--------------|--------------|----------------------|--------------------|--------------|--------------|------|---------|---------|----------------------------|----------------------------|-----------|--------------|
| <u>month</u>            |                    |              |              |                      |                    |              |              |      |         |         |                            |                            |           |              |
| <i>sd(intercept)</i>    | 1.22               | 0.44         | 3.42         | <i>intercept</i>     | -2.50              | -4.22        | -0.78        | 0.88 | -2.86   | < 0.01  |                            | September                  | -1.21     | 0.13         |
| <i>sd(ln(distance))</i> | 0.13               | 0.05         | 0.38         | <i>ln(distance)</i>  | -0.38              | -0.57        | -0.19        | 0.1  | -3.92   | < 0.001 |                            | November                   | 1.21      | -0.13        |
| <i>cor</i>              | -1.00              | -1.00        | 0.24         | <i>cor</i>           | -1                 |              |              |      |         |         |                            | Sept. / <i>P. phoxinus</i> | 0.03      |              |
|                         |                    |              |              |                      |                    |              |              |      |         |         |                            | Sept. / salmonids          | -0.04     |              |
|                         |                    |              |              |                      |                    |              |              |      |         |         |                            | Nov. / <i>P. phoxinus</i>  | 0.11      |              |
|                         |                    |              |              |                      |                    |              |              |      |         |         |                            | Nov. / salmonids           | -0.09     |              |
| <u>fish family</u>      |                    |              |              |                      |                    |              |              |      |         |         |                            |                            |           |              |
| <i>sd(intercept)</i>    | 0.09               | 0.04         | 0.22         |                      |                    |              |              |      |         |         |                            |                            |           |              |

615

616 Parameter estimates and confidence limits are given for fixed effects, in addition to the correlation (*cor*) between intercept and ln(distance). For  
 617 random effects, these values are provided for the standard deviations (*sd*). Additionally, the estimated deviations of intercept and ln(distance) from  
 618 the fixed effects parameter estimate are provided per random effect.

619

620 **Figure 1:** Schematic view of the cage placement in the stream and the hydrological conditions prevailing during the August, September, and  
621 November trial. Larger flowlines and eddies code for stronger currents. Due to reduced discharge, relative location and number of eDNA samples  
622 was not kept uniform between trials. Note that additional sampling distances up to 1.3 km downstream of the cages are not displayed.

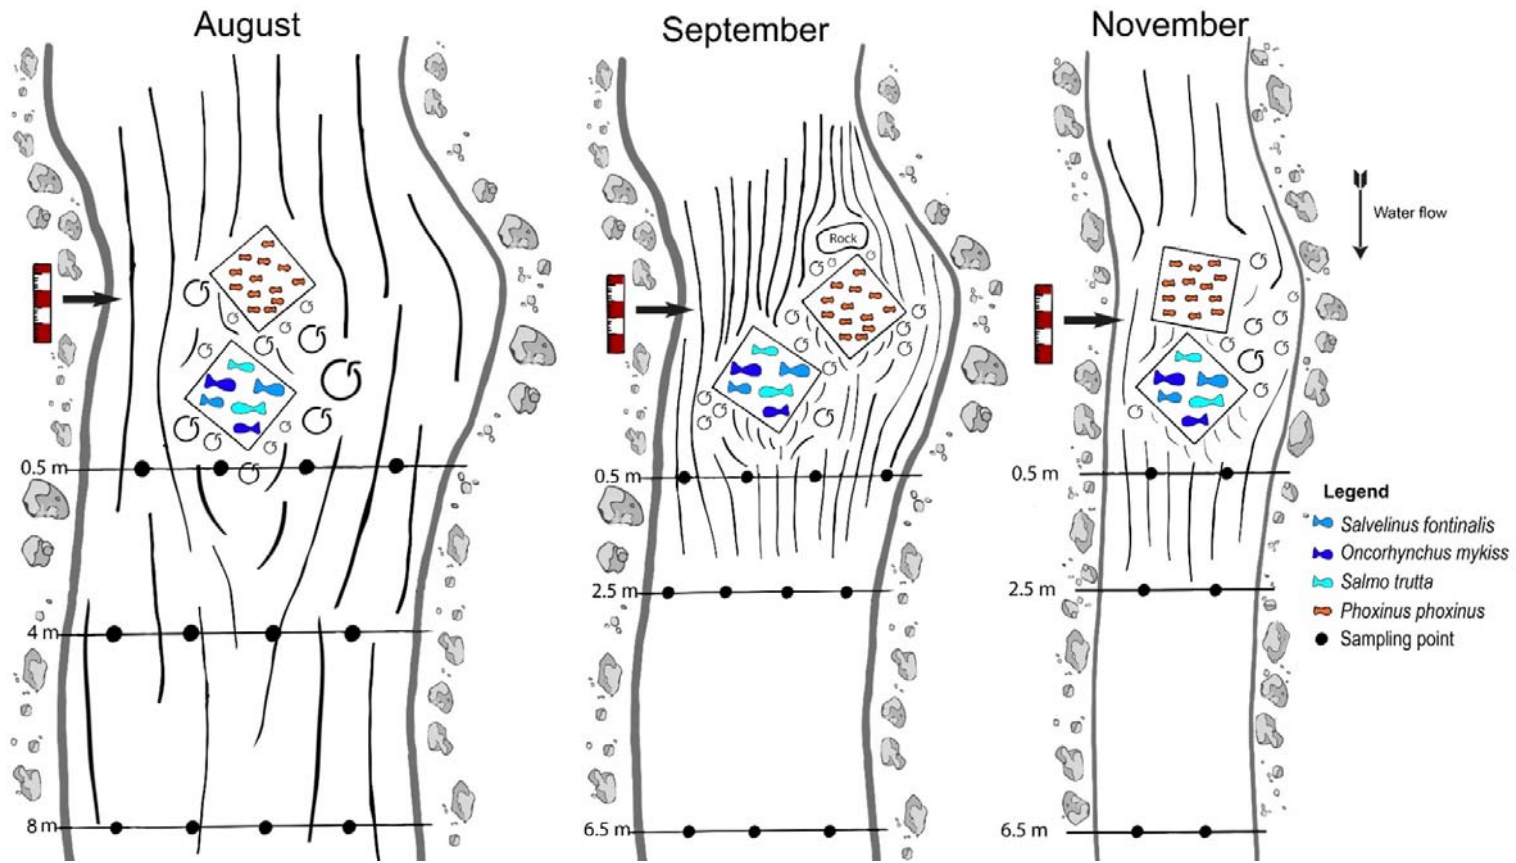

623

624 **Figure 2:** Heatmaps showing the small-scale eDNA distribution until 20 m downstream of the  
625 cages during the three examined discharge situations. As eDNA levels differed between  
626 *Phoxinus phoxinus* and the salmonids, different colour scales were used. However, coloring  
627 per taxon remains constant for the three trials. Isotherms display interpolated differences of  
628 0.05 RFU; the irregular shape in November reflects an increase in wetted width downstream  
629 of the cages.

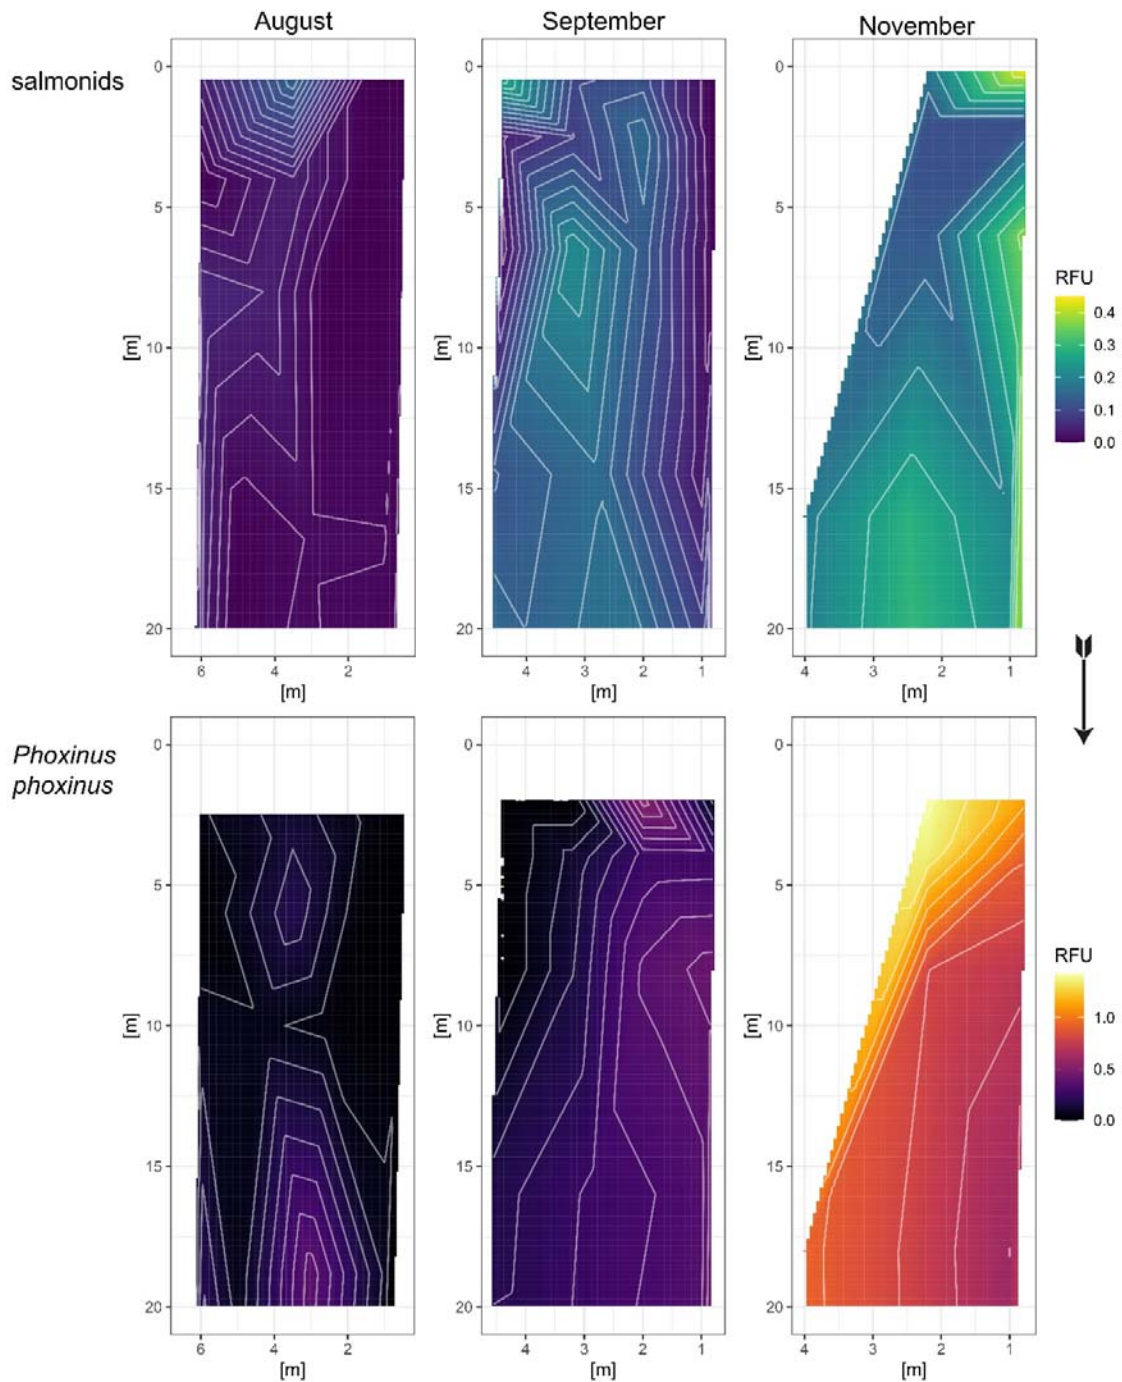

630

631 **Figure 3:** The discharge-corrected eDNA signal strengths of *P. phoxinus* and the salmonid species are displayed for downstream distances with  
 632 homogeneous lateral eDNA distribution for August, September, and November. Additionally, the discharge at each distance (three values each) is  
 633 displayed.

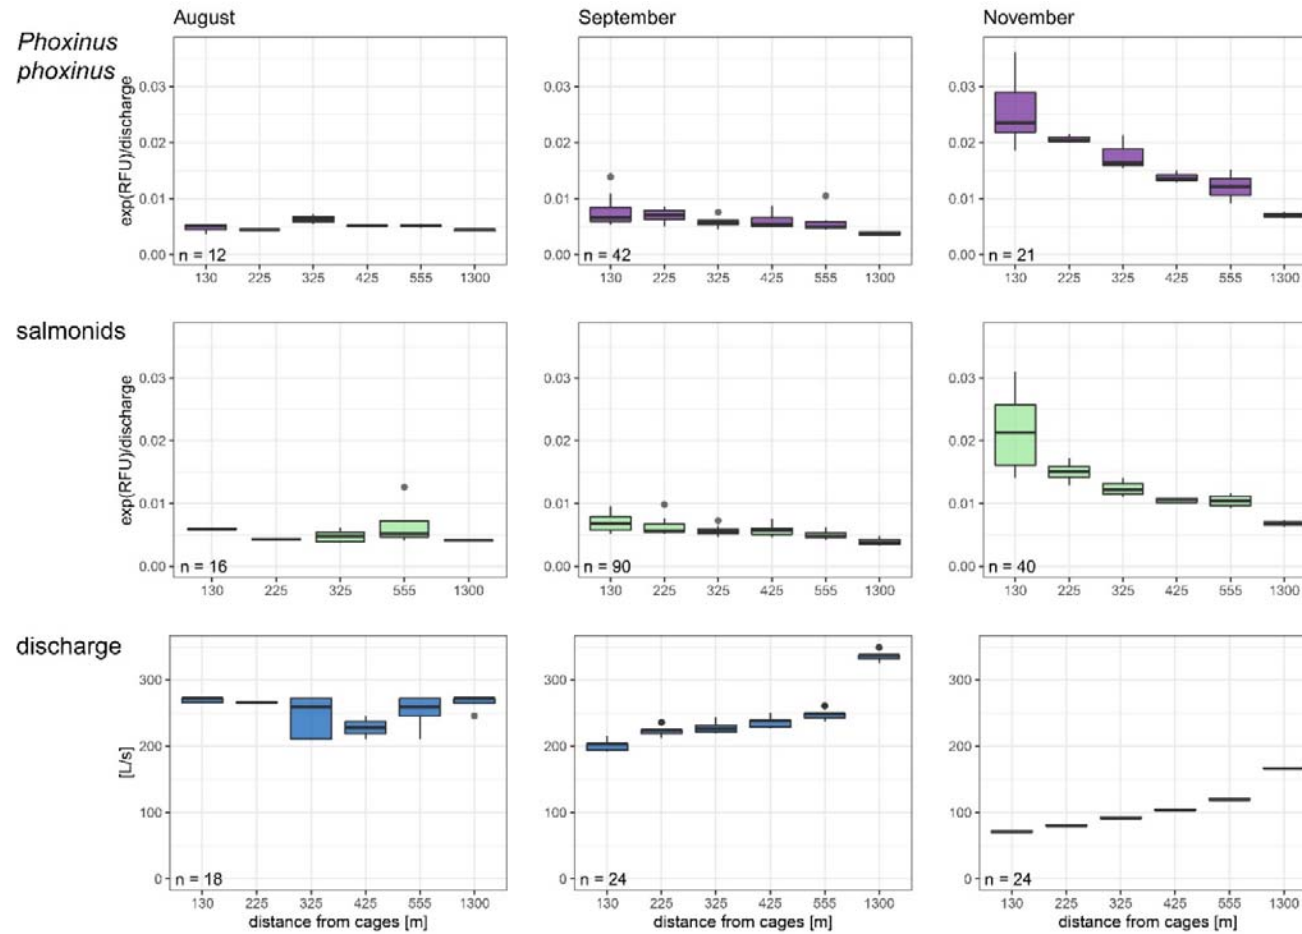

634 **Figure 4:** The pie charts display the proportion of PCR positives for *P. phoxinus* and the  
635 salmonid species per trial; dark shading codes for successful detection; the number of positives  
636 and total reactions are shown between pie charts and boxplots. The RFUs of positive samples  
637 are displayed as boxplots; white circles code for mean values. RFUs of *P. phoxinus* are  
638 significantly higher than salmonid RFUs ( $p < 0.05$ ) for the November trial. The bottom panel  
639 shows species-specific eDNA signals obtained during September and November from 130 m to  
640 1.3 km downstream of the cages (distance and RFUs are transformed); regression lines are  
641 displayed separately per species and month (cp. model "f").

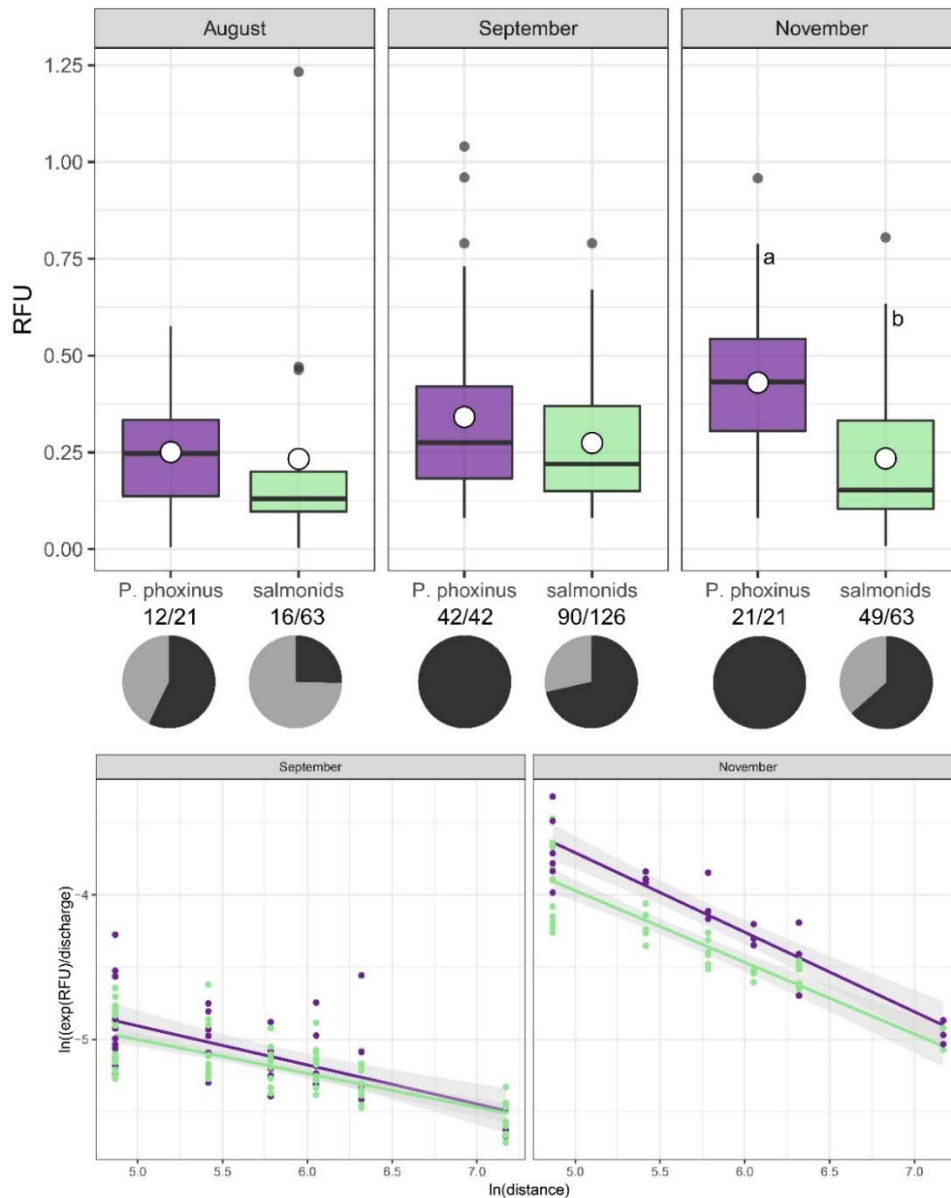

642
